# Supplementary material for: Observer’s anxiety facilitates magnocellular processing of clear facial threat cues, but impairs parvocellular processing of ambiguous facial threat cues
Source: PubMed Central journal article supplement (PMC5680327; doi:10.1038/s41598-017-15495-2), 2017-11-09
Supplement: 41598_2017_15495_MOESM1_ESM.pdf [file 41598_2017_15495_MOESM1_ESM.pdf]

Im et al.

**Supplementary Information**

**Observer's anxiety facilitates magnocellular processing of clear facial threat cues, but impairs parvocellular processing of ambiguous facial threat cues.**

Hee Yeon Im<sup>1,2</sup>, Reginald B. Adams, Jr.<sup>3</sup>, Jasmine Boshyan<sup>1,2</sup>, Noreen Ward<sup>1</sup>,  
Cody A. Cushing<sup>1</sup>, Kestutis Kveraga<sup>1,2</sup>

<sup>1</sup>Athinoula A. Martinos Center, Department of Radiology, Massachusetts General Hospital, Charlestown, MA, U.S.A.

<sup>2</sup>Department of Radiology, Harvard Medical School, Boston, MA, U.S.A.

<sup>3</sup>Department of Psychology, The Pennsylvania State University, State College, PA, U.S.A.

**Supplementary Results 1. Behavioral results (response time and proportion correct) for ambiguous threat cues (direct-gaze fear faces) presented in M-biased stimuli and for clear threat cues (averted-gaze fear faces) presented in P-biased stimuli.**

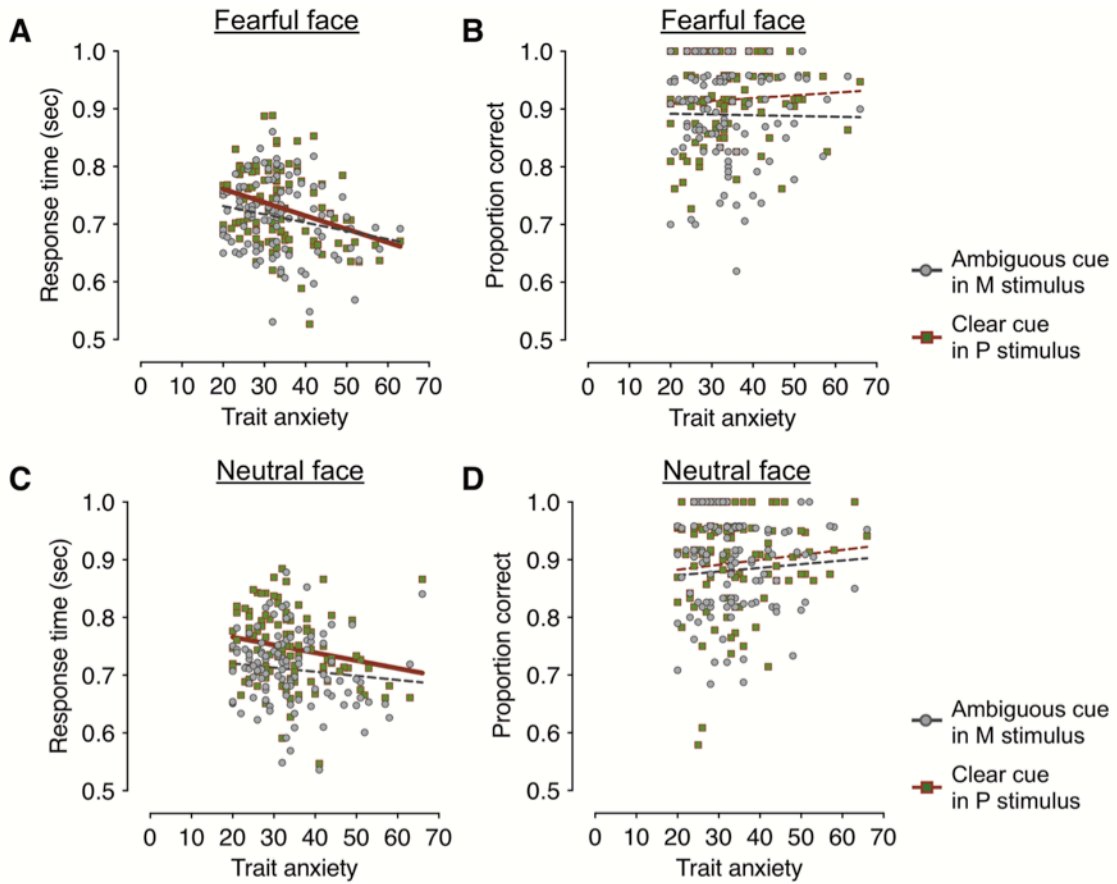

**Supplementary Results 2. BOLD activations from group analysis, thresholded at  $p < 0.001$ , uncorrected,  $k > 5$ .**

| Contrast Name                                | Region Label                                 | Extent                      | t-value | MNI Coordinates |     |     |     |
|----------------------------------------------|----------------------------------------------|-----------------------------|---------|-----------------|-----|-----|-----|
|                                              |                                              |                             |         | x               | y   | z   |     |
| <b><i>M averted fear - M direct fear</i></b> | R dorsolateral prefrontal cortex             | 83                          | 4.297   | 57              | 41  | 4   |     |
|                                              | L anterior orbitofrontal cortex              | 27                          | 4.059   | -21             | 56  | -14 |     |
|                                              | R anterior orbitofrontal cortex              | 37                          | 3.945   | 18              | 56  | -18 |     |
|                                              |                                              |                             | 9       | 3.502           | 36  | 50  | -18 |
|                                              | L preSMA                                     | 13                          | 3.713   | -9              | 29  | 46  |     |
|                                              | R preSMA                                     | 100                         | 3.985   | 12              | 29  | 50  |     |
|                                              | L precentral gyrus                           | 20                          | 3.519   | -51             | 2   | 44  |     |
|                                              | L precentral gyrus                           | 7                           | 3.294   | -36             | -1  | 48  |     |
|                                              | R posterior cingulate cortex                 | 9                           | 3.937   | 15              | -31 | 40  |     |
|                                              | L middle temporal gyrus                      | 9                           | 3.749   | -63             | 2   | -30 |     |
|                                              | R middle temporal gyrus                      | 37                          | 3.602   | 72              | -43 | -12 |     |
|                                              | R lateral orbitofrontal cortex               | 31                          | 3.741   | 39              | 26  | -6  |     |
|                                              | L insula                                     | 26                          | 3.738   | -21             | 23  | 0   |     |
|                                              | R hippocampus                                | 37                          | 3.617   | 33              | -22 | -14 |     |
|                                              | R superior frontal gyrus                     | 48                          | 3.583   | 39              | 2   | 42  |     |
|                                              | L thalamus                                   | 10                          | 3.568   | -6              | -19 | 6   |     |
|                                              | L occipital cortex (BA18)                    | 33                          | 3.449   | -24             | -94 | -12 |     |
|                                              | L middle cingulate cortex                    | 9                           | 3.436   | -12             | -13 | 38  |     |
|                                              | L intraparietal sulcus                       | 7                           | 3.413   | -33             | -52 | 40  |     |
|                                              | L supramarginal gyrus                        | 6                           | 3.237   | -57             | -31 | 40  |     |
|                                              | R superior parietal lobule                   | 7                           | 3.180   | 39              | -52 | 50  |     |
|                                              | R amygdala *                                 | 55                          | 2.904   | 27              | 2   | -14 |     |
|                                              | L cerebellum                                 | 24                          | 4.061   | -9              | -49 | -16 |     |
|                                              |                                              |                             | 24      | 3.522           | -6  | -82 | -32 |
|                                              |                                              |                             | 17      | 3.242           | -30 | -73 | -48 |
|                                              | R cerebellum                                 | 19                          | 3.477   | 9               | -82 | -36 |     |
|                                              | <b><i>M direct fear - M averted fear</i></b> | None                        |         |                 |     |     |     |
| <b><i>P direct fear - P averted fear</i></b> | L inferior temporal gyrus                    | 216                         | 5.772   | -45             | -37 | -26 |     |
|                                              |                                              | 20                          | 3.841   | -60             | -16 | -32 |     |
|                                              | R inferior temporal gyrus                    | 17                          | 3.543   | 51              | -43 | -24 |     |
|                                              | L fusiform cortex                            | 100                         | 4.202   | -39             | -73 | -18 |     |
|                                              | R fusiform cortex                            | 18                          | 3.793   | 36              | -28 | -34 |     |
|                                              | L superior frontal gyrus                     | 37                          | 3.729   | -36             | 32  | 52  |     |
|                                              | R superior frontal gyrus                     | 19                          | 3.465   | 21              | 44  | 52  |     |
|                                              | R occipital cortex (BA19)                    | 32                          | 3.996   | 27              | -82 | -18 |     |
|                                              | R supplementary motor area                   | 21                          | 3.866   | 9               | 2   | 48  |     |
|                                              | L amygdala                                   | 11                          | 3.531   | -18             | 2   | -20 |     |
|                                              | L brainstem                                  | 7                           | 3.508   | -3              | -28 | -4  |     |
|                                              | R retrosplenial cortex                       | 22                          | 3.458   | 6               | -46 | 10  |     |
|                                              | R postcentral gyrus                          | 16                          | 3.428   | 57              | -28 | 56  |     |
|                                              | <b><i>P averted fear - P direct fear</i></b> | R anterior cingulate cortex | 89      | 3.860           | 15  | 38  | 18  |
| L insula                                     |                                              | 19                          | 3.527   | -30             | 8   | 14  |     |

**Supplementary Results 3. The magnitude of hemispheric lateralization in amygdala, obtained by subtracting the % signal change in the left amygdala from that in the right amygdala, when participants were viewing neutral faces. We did not find any significant trends between the magnitude of lateralization and trait anxiety, when observers were viewing neutral faces.**

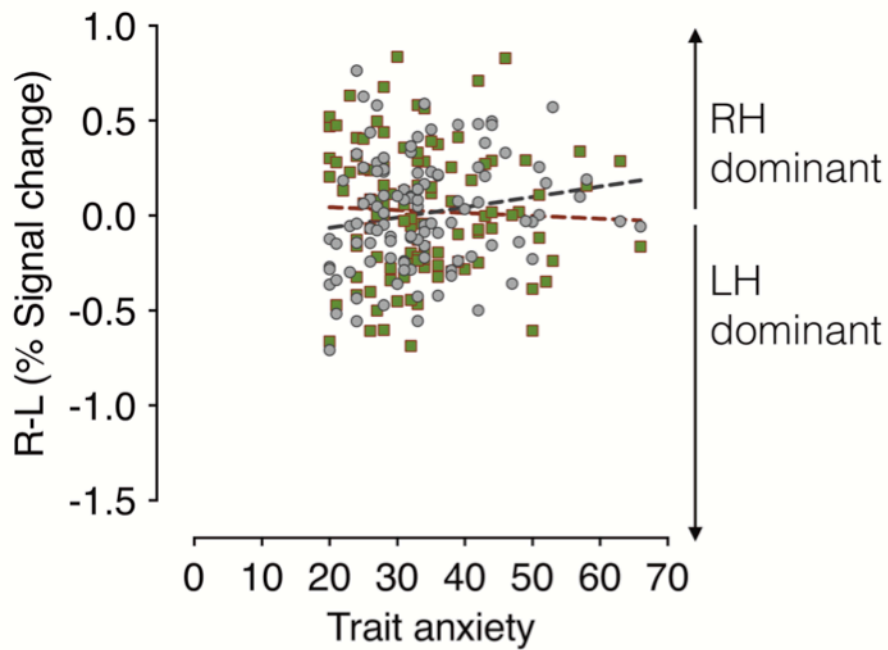

**Supplementary Results 4. The left and right FFA [ $\pm 42$  -52 -26] activation during perception of fearful faces.**

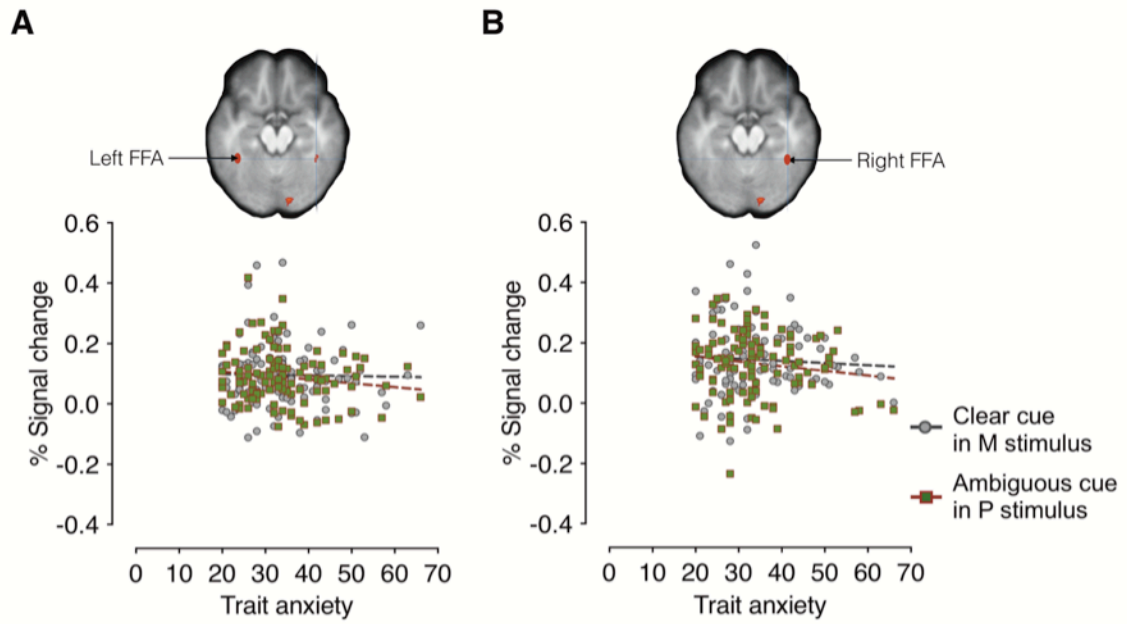

Im et al.

**Supplementary Table 1. The breakdown of the participants' ethnic background.**

| Racial Categories         | Not Hispanic or Latino | Hispanic or Latino | Unknown/Not reported | Total |
|---------------------------|------------------------|--------------------|----------------------|-------|
| Asian                     | 24                     |                    |                      |       |
| Black or African american | 15                     |                    |                      |       |
| White                     | 54                     | 7                  |                      |       |
| Total                     | 93                     | 7                  | 8                    | 108   |
